# Supplementary material for: The Impact of Digital Coaching Intervention for Improving Healthy Ageing Dimensions among Older Adults during Their Transition from Work to Retirement
Source: MDPI journal article supplement (doi:10.3390/ijerph20054034), 2023-02-24
Supplement: s1 [file s1]

**Table S1.** Digital coach activities per functioning realm

| Physical Activities      |                       | Mental well-being                 |                                                   | Socialization            |                   | Retirement                        |                             |                                                                   |
|--------------------------|-----------------------|-----------------------------------|---------------------------------------------------|--------------------------|-------------------|-----------------------------------|-----------------------------|-------------------------------------------------------------------|
| No sub-realms            | Mind and body         | Thought and action                | Emotions and memories                             | You and the others       | You and the world | Activities for transition         | Suggestions                 | Infos for transition                                              |
| <b>Cycling</b>           | Connection to Ikigai  | To do list                        | Album of memories                                 | Kindness carries you on! |                   | Competences transmission          | Sources of inspiration      | Retirees' rights                                                  |
| <b>Walking</b>           | Thinking and movement | Say it out loud                   | Be grateful for three things (Diary of gratitude) | Fill up with memories!   | A new language!   | Planning a meeting                | Good news!                  | Who can help you in the transition to retirement: trade-unions    |
| <b>Gardening</b>         | Count! Breathe!       | Ask-Do!                           | Compliment someone!                               | 2 minute of gratitude!   | Film-therapy      | Pros and cons of the working life | Spend time with loved ones! | App for planning and economic management like the post office app |
| <b>Yoga</b>              | Body connections      | Take a break from the web!        | Think about your success!                         | How do others see you?   | Art feeds!        | Plan a party for retirement!      | Be strong!                  | Explore the activities you may do once retired                    |
| <b>Strength training</b> | Mindfulness           | How we make our wishes come true? | Strengthen the relationship with yourself         | Make new acquaintances   | New flavors       | Parting with work                 |                             | Municipality website: initiatives for retirees                    |

|                        |                           |                              |                                     |                                         |                                                                                                                         |
|------------------------|---------------------------|------------------------------|-------------------------------------|-----------------------------------------|-------------------------------------------------------------------------------------------------------------------------|
| <b>Dancing</b>         | Eat green!!               | Get out of your comfort zone | How do others see you?              | Social roles in balance                 | Imagine and plan your days<br>Decide which social roles to take on<br>Make something good for others<br>Good intentions |
| <b>Dish washing</b>    | Free Dance                | Stay awake!                  | The importance of the little things | Follow your models                      |                                                                                                                         |
| <b>Ironing</b>         | Living green!             | Put yourself first           | Joy from the wardrobe               | My social network                       |                                                                                                                         |
| <b>Mowing the lawn</b> | Positive psychology!      | Look round with new eyes!    | How many memories in your home      | Share one receipt you made healthier    |                                                                                                                         |
| <b>Golf</b>            | Change way                | Same way, different eyes     | Self interpretation                 | What's been going on today?             |                                                                                                                         |
| <b>Soft gymnastic</b>  | Take out your voice!      | Change your point of view    | Be proud of one habit of yours      | Increase the quality of your friendship |                                                                                                                         |
| <b>Horse riding</b>    | Be active!                | Bite your tongue!            |                                     |                                         |                                                                                                                         |
| <b>Tennis</b>          | Ten minutes of creativity |                              |                                     |                                         |                                                                                                                         |
| <b>Swimming</b>        |                           |                              |                                     |                                         |                                                                                                                         |

---
